# Supplementary material for: Synthesis of nickel hydroxychloride microspheres via a facile template-free process and their conversion to β-Ni(OH)2 microspheres
Source: Royal Society of Chemistry journal article supplement (doi:10.1039/c4ce01605j), 2014-01-01
Supplement: c4ce01605j1.pdf [file c4ce01605j1.pdf]

## Electronic Supporting Information (ESI)

### Synthesis of nickel hydroxide microspheres via a facile template-free process and their conversion to $\beta$ -Ni(OH)<sub>2</sub> microspheres

Kay He, Gaoling Zhao\*, Gaorong Han

State Key Laboratory of Silicon Materials and Department of Materials Science and Engineering and Key Laboratory of Advanced Materials and Applications for Batteries of Zhejiang Province, Zhejiang University, Hangzhou 310027, P. R. China

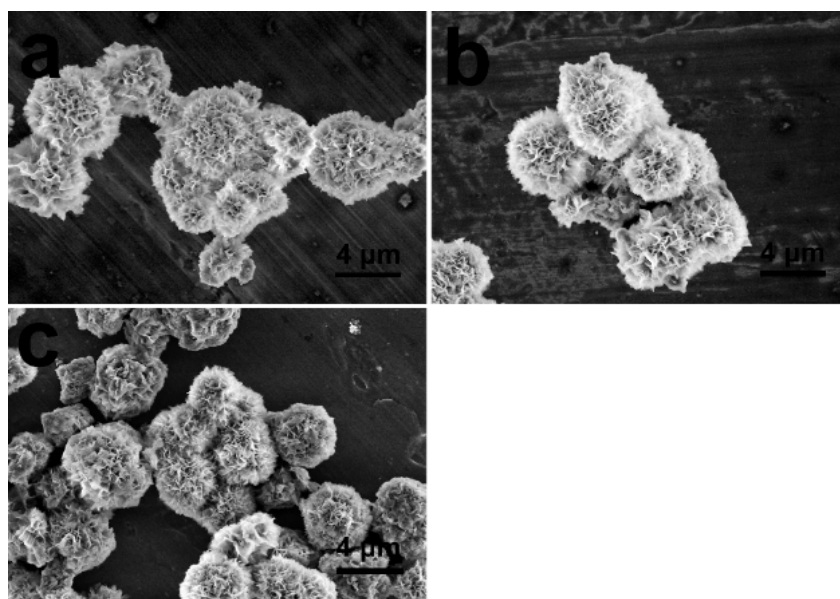

Figure S1. FE-SEM images of the samples prepared for (a) 9 h, (b) 12 h and (c) 18 h.

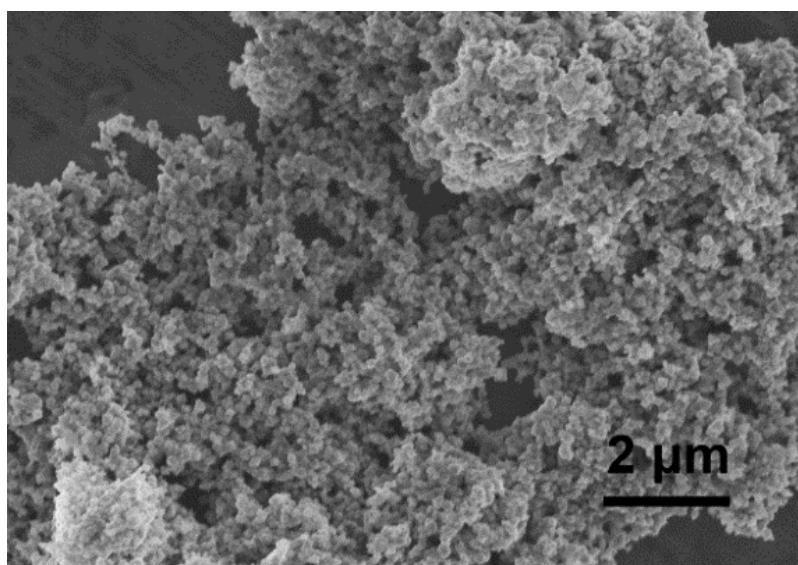

Figure S2. FE-SEM image of the sample prepared by nickel hydroxychloride microspheres after heat treatment at 350 °C

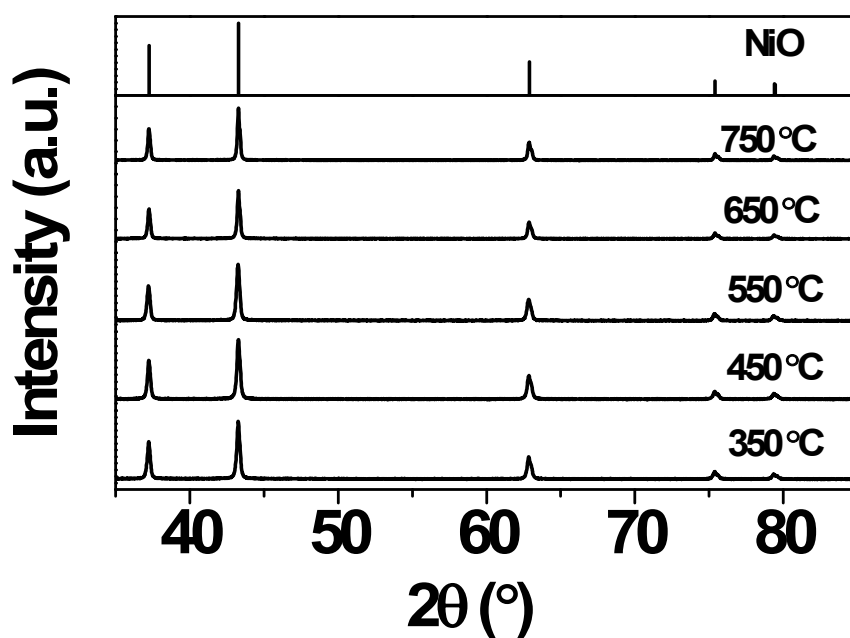

Figure S3. XRD patterns of the samples prepared by nickel hydroxychloride microspheres after the heat treatment at various temperature.

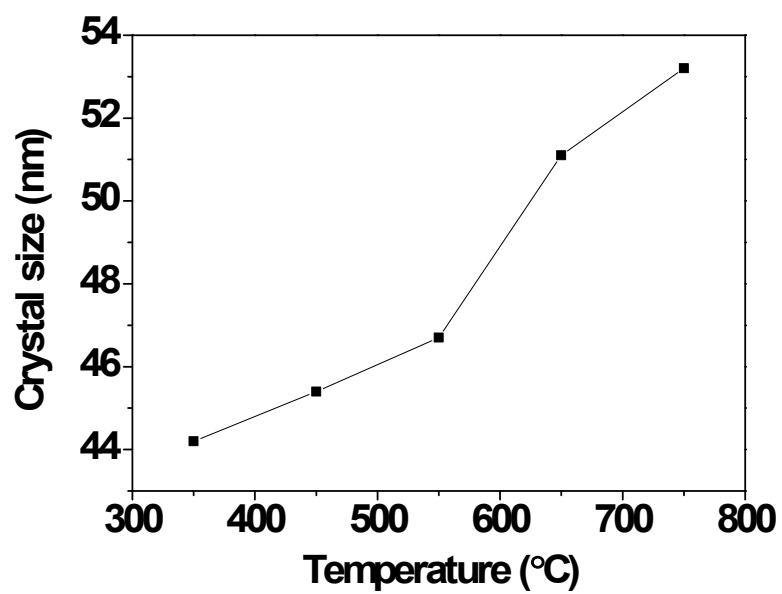

Figure S4. Crystal sizes of the samples prepared by nickel hydroxychloride microspheres after the heat treatment at various temperature.

Table 1 X-ray diffraction powder data of the sample prepared with 5.1 M H<sub>2</sub>O

| No. | d (Å)  | I (%) |
|-----|--------|-------|
| 1   | 5.6774 | 100.0 |
| 2   | 2.8258 | 0.9   |
| 3   | 2.6854 | 16.3  |
| 4   | 2.1782 | 6.7   |
| 5   | 1.8923 | 1.8   |
| 6   | 1.8441 | 2.6   |
| 7   | 1.6333 | 7.6   |
| 8   | 1.5701 | 3.2   |
| 9   | 1.4178 | 1.0   |
| 10  | 1.3952 | 1.1   |
